# Supplementary material for: Azacitidine plus venetoclax as post-transplant maintenance therapy in high-risk myeloid malignancies: a propensity score-matched analysis
Source: Research Square preprint supplement (doi:10.21203/rs.3.rs-8886738/v1), 2026-02-22
Supplement: Supplementary file 1 [file 175fd6597f60adae77a6b996.docx]

**Table 2. Summary of Adverse Events.**

| Adverse Event | AZA-VEN (n=40) | |
| --- | --- | --- |
| Hematologic toxicities, n (%) | Grade 1-2 | Grade 3-4 |
| Leukopenia | 21(52.5) | 5(12.5) |
| Neutropenia | 9(22.5) | 12(30) |
| Thrombocytopenia | 10(25) | 4(10) |
| Anemia | 13(32.5) | 5(12.5) |
| Non-hematologic toxicities, n (%) | |  |
| Hepatotoxicity |  |  |
| Alanine Aminotransferase Elevation | 15(37.5) | 1(2.5) |
| Aspartate Aminotransferase Elevation | 13(32.5) | 2(5) |
| Nephrotoxicity |  |  |
| Serum Creatinine Elevation | 1(2.5) | 0 |
| Hyperuricemia | 4(10) | 1(2.5) |
| Gastrointestinal events |  |  |
| Nausea | 17(42.5) | 1(2.5) |
| Vomiting | 8(20) | 1(2.5) |
